# Supplementary material for: Glioblastoma Cell–Derived lncRNA-Containing Exosomes Induce Microglia to Produce Complement C5, Promoting Chemotherapy Resistance
Source: Oxford University Press journal article supplement (doi:10.1158/2326-6066.cir-21-0258), 2021-10-19
Supplement: 23266066cir210258-sup-263374_3_supp_7366624_r0zdlf.docx [file 23266066cir210258-sup-263374_3_supp_7366624_r0zdlf.docx]

**Supplementary Data**

**Supplementary Figures**

**
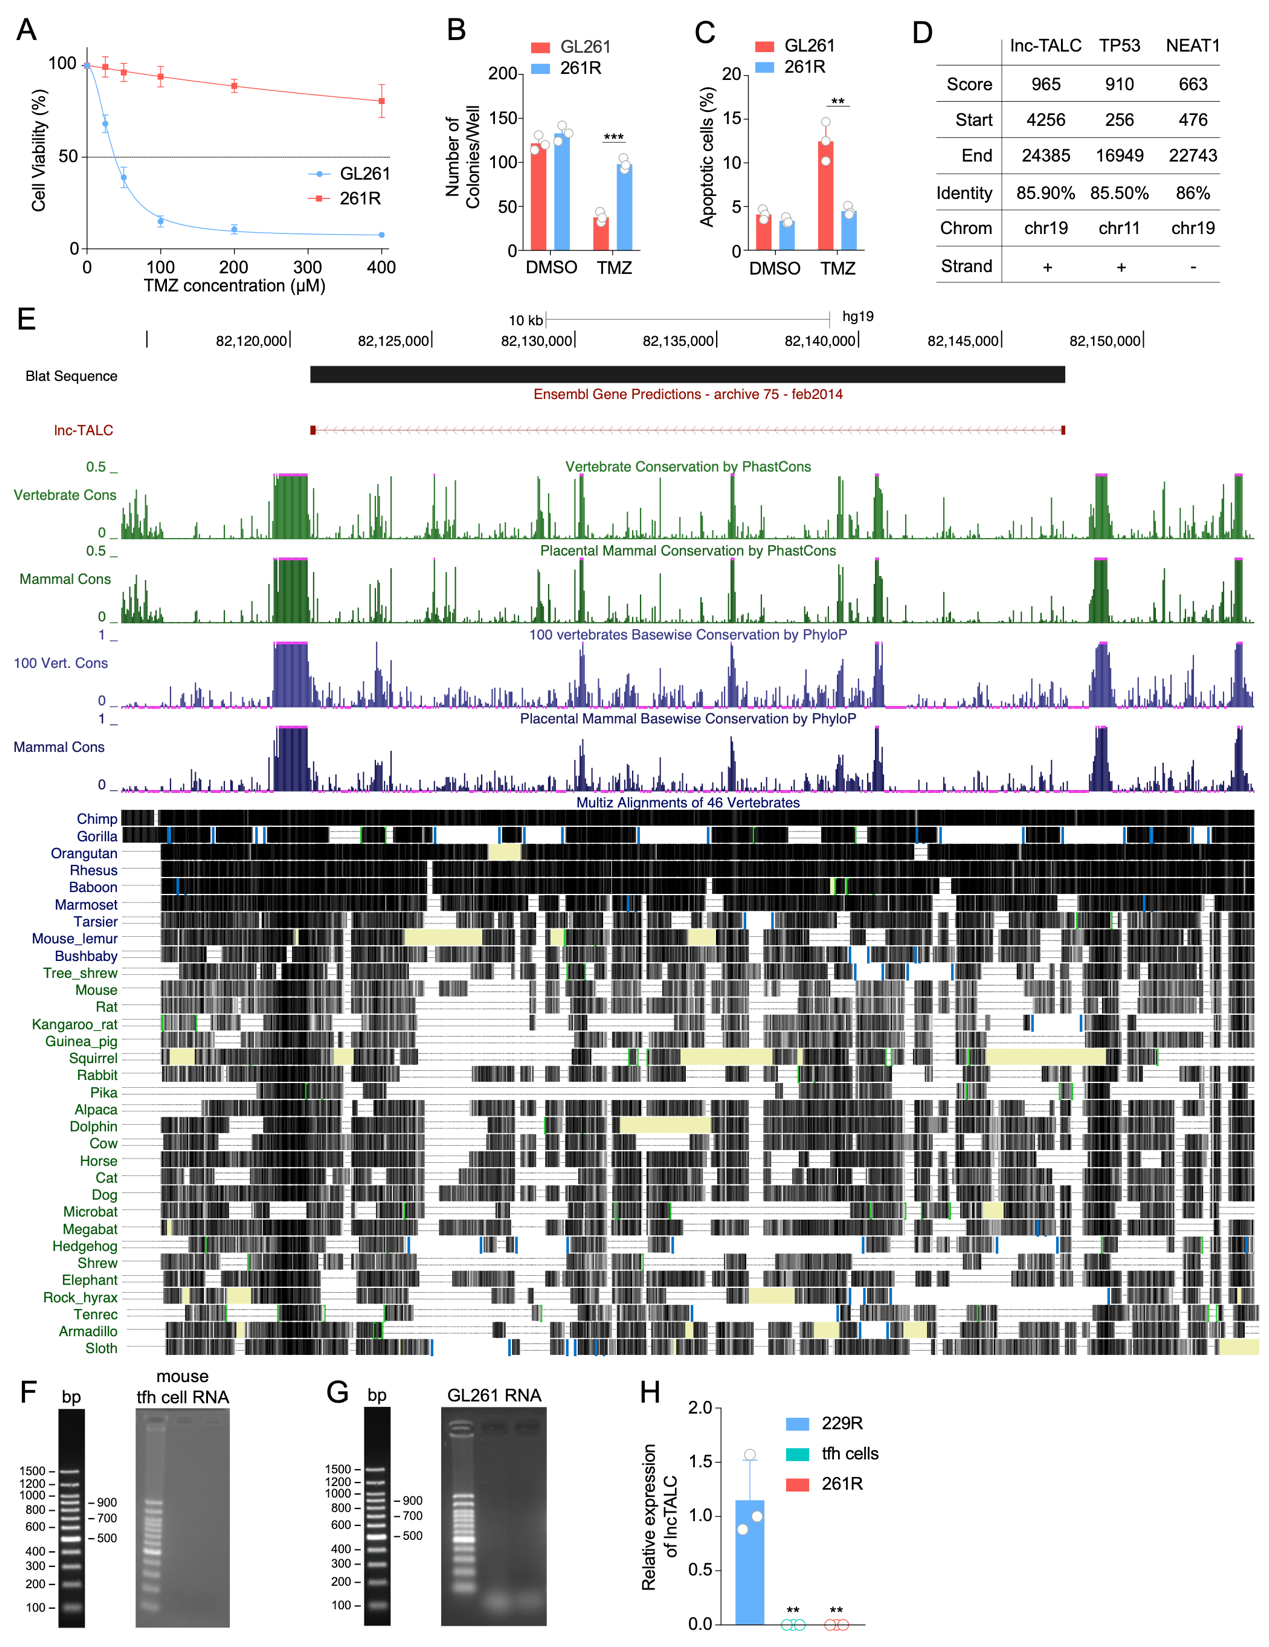
Supplementary Figure S1. The establishment of TMZ-resistant 261R cells and conservation analysis of *lnc-TALC*.**

A. CCK-8 assay of GL261 and 261R cells upon TMZ treatment at the indicated concentrations for 72 hours (n = 3).

B. Colony formation assay of GL261 and 261R cells upon TMZ treatment (100 μM) in a 6-well dish (300 cells well-1) for 11 days (n = 3).

C. FC analysis of apoptosis in GL261 and 261R cells upon TMZ treatment (100 μM) for 72 hours (n = 3).

D. Sequence information of *lnc-TALC*, TP53 and NEAT1. TP53 served as a positive control and NEAT1 served as a negative control.

E. UCSC genomic browser view of *lnc-TALC* represented in the UCSC browser for human genome.

F. Image of PCR product from the RACE procedure in mouse tfh cells.

G. Image of PCR product from the RACE procedure in GL261 cells.

H. qRT-PCR analysis of *lnc-TALC* in 229R, thf cells and 261R cells (n = 3). Data are presented as the mean ± S.D. P value is determined by Student’s t-test or one-way ANOVA. Significant results are presented as **P < 0.01, or ***P < 0.001.

**
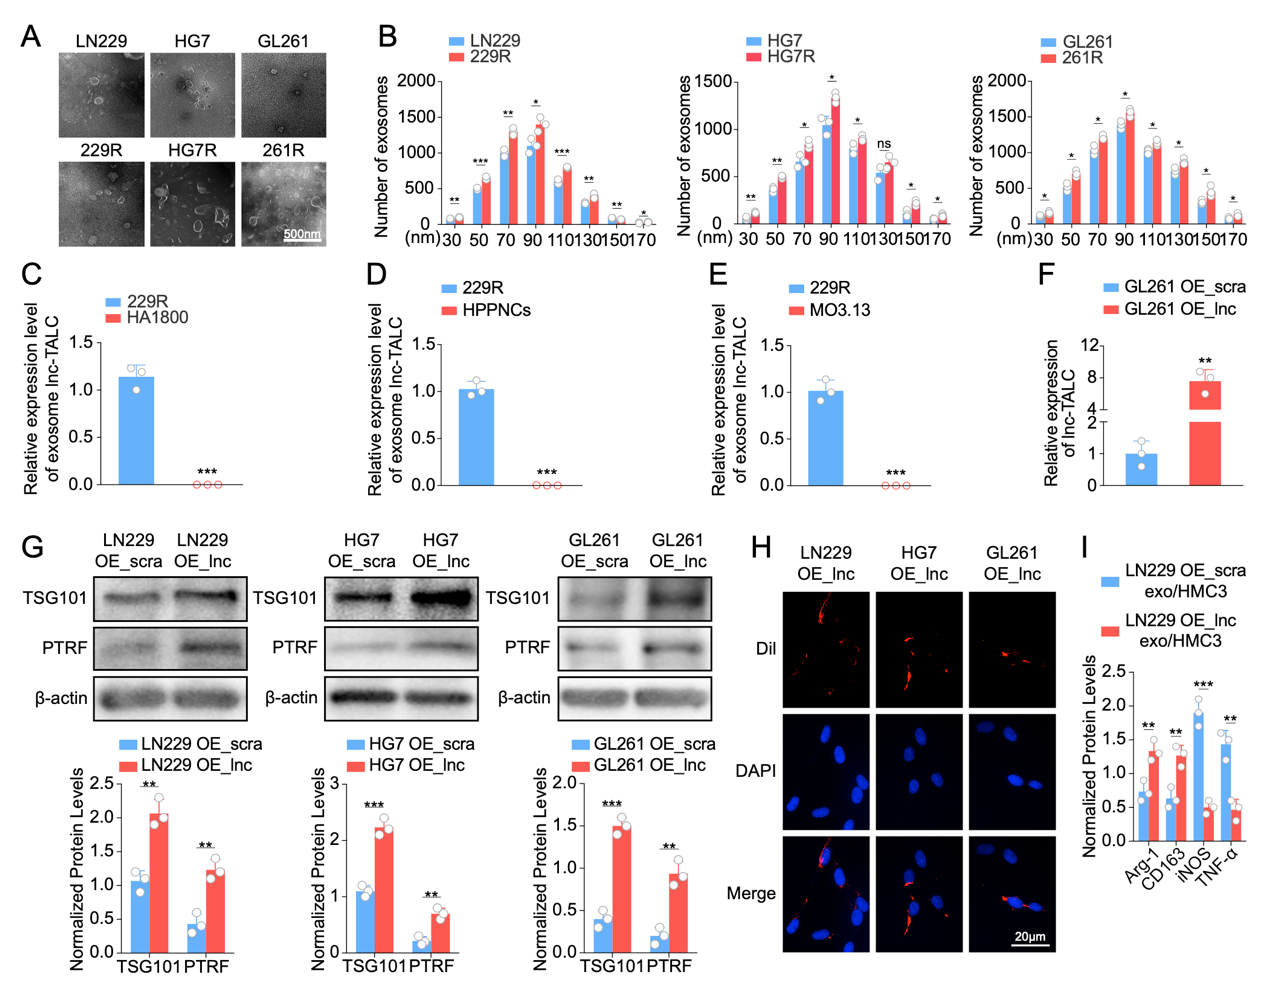
Supplementary Figure S2. *Lnc-TALC* contributes to exosome formation.**

A. Electron microscopy images of exosomes derived from TMZ-resistant GBM cells and corresponding parental cells. Scale bar = 500 nm.

B. The histogram showed the size (diameters) of exosomes from TMZ resistant GBM cells and the parental cells (n = 3).

C. qRT-PCR analysis of *lnc-TALC* expression in exosomes from human astrocytes HA1800 (n = 3).

D. qRT-PCR analysis of *lnc-TALC* expression in exosomes from human neurons HPPNCs (n = 3).

E. qRT-PCR analysis of *lnc-TALC* expression in exosomes from human oligodendrocytes MO3.13 (n = 3).

F. qRT-PCR analysis validated the overexpression of *lnc-TALC* in GL261 cells (n = 3).

G. WB analysis of TSG101 and PTRF in GBM cells overexpressing *lnc-TALC*. Protein levels were normalized to β-actin.

H. Representative IF image showing the internalization of Dil-labelled exosomes by microglia. Scale bar = 20 μm.

I. Quantification of the relative levels of markers for microglia shown in panel Figure 1H compared with β-actin. Data are presented as the mean ± S.D. P value is determined by Student’s t-test. Significant results are presented as ns non-significant, *P < 0.05, **P < 0.01, or ***P < 0.001.

**
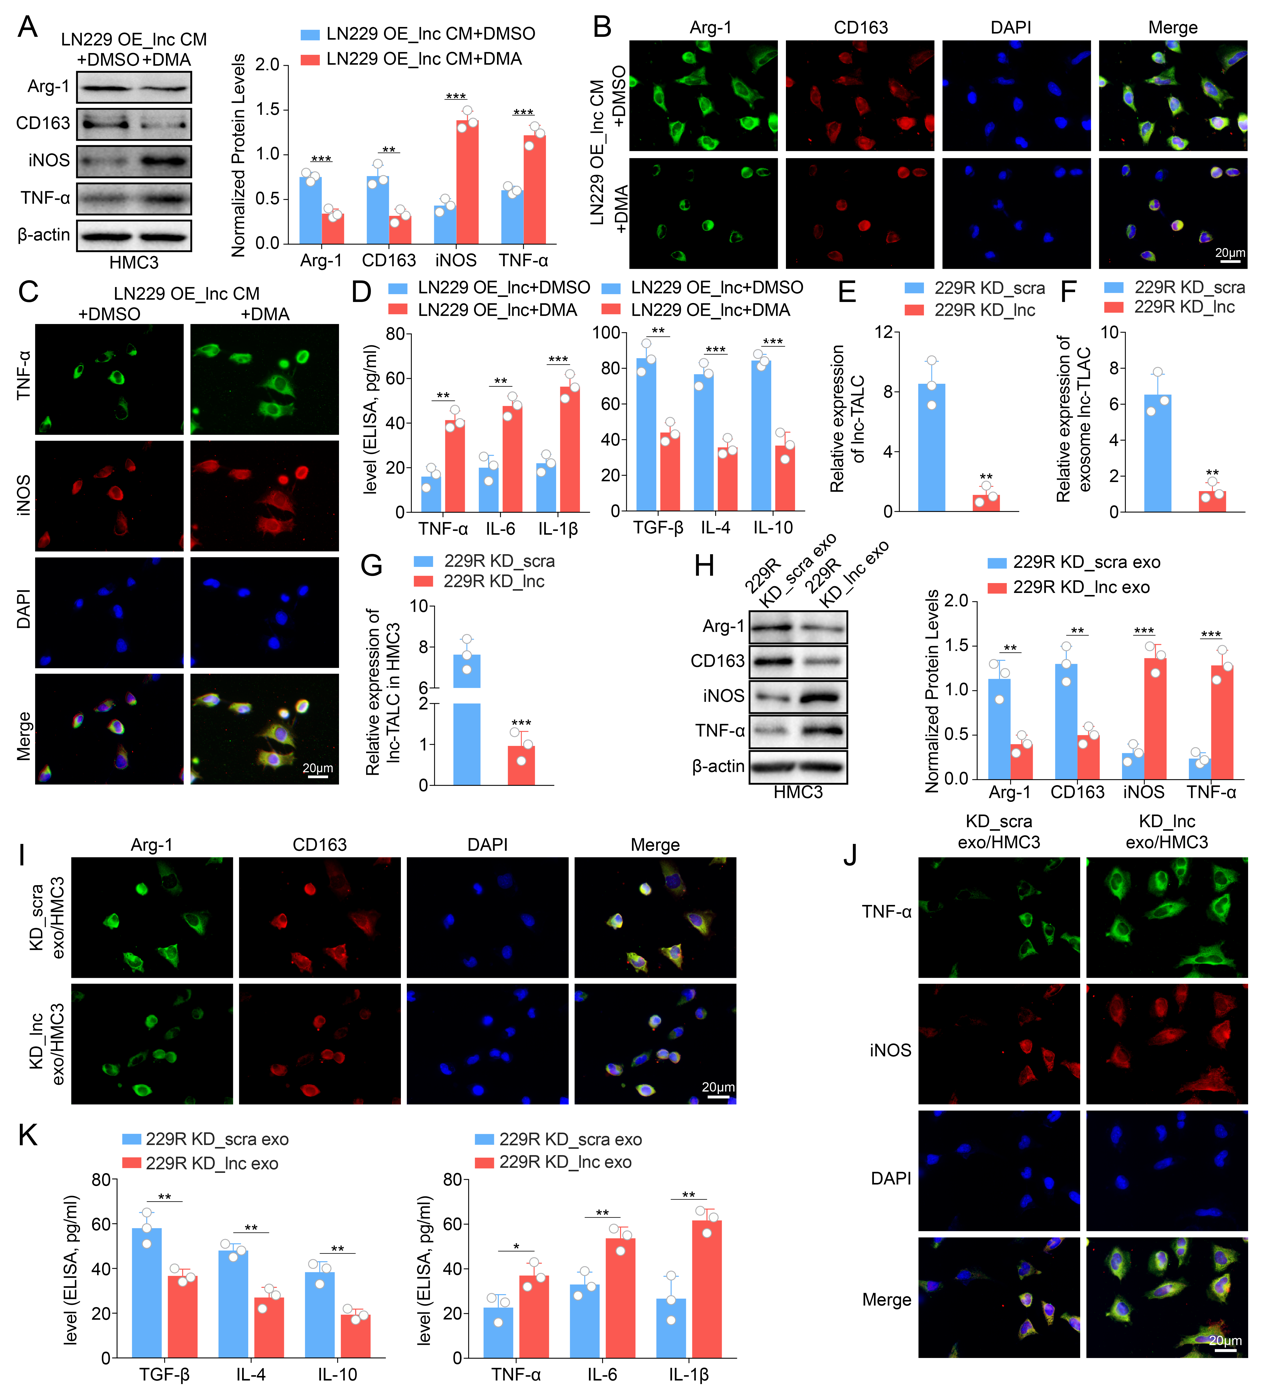
Supplementary Figure S3. Inhibiting exosome secretion or knocking down *lnc-TALC* can reverse M2 polarization of microglia.**

A. WB analysis of indicated proteins in microglia cultured in CM from DMA treated LN229 cells overexpressing *lnc-TALC*. Protein levels were normalized to β-actin.

B. IF analysis of M2 markers in microglia cultured in CM from DMA treated LN229 cells overexpressing *lnc-TALC*.

C. IF analysis of M1 markers in microglia cultured in CM from DMA treated LN229 cells overexpressing *lnc-TALC*.

D. ELISA assay indicated differential expression of TNF-α, IL-6, IL-1β, TGF-β, IL-4 and IL-10 in CM of microglia cultured in CM from DMA treated LN229 cells overexpressing *lnc-TALC* (n = 3).

E. qRT-PCR analysis of *lnc-TALC* in TMZ resistant GBM cells knocking down *lnc-TALC* and the scramble cells (n = 3).

F. qRT-PCR analysis of *lnc-TALC* in exosomes from 229R_KD cells and the scramble cells (n = 3).

G. qRT-PCR analysis of *lnc-TALC* in microglia treated with exosomes from 229R_KD cells and the scramble cells (n = 3).

H. WB analysis of indicated proteins in microglia cultured with exosomes from TMZ resistant GBM cells knocking down *lnc-TALC* or the scramble cells. Protein levels were normalized to β-actin.

I. IF analysis of M2 markers in microglia cultured with exosomes from TMZ resistant GBM cells knocking down *lnc-TALC* or the scramble cells.

J. IF analysis of M1 markers in microglia cultured with exosomes from TMZ resistant GBM cells knocking down *lnc-TALC* or the scramble cells.

K. ELISA assay indicated differential expression of TNF-α, IL-6, IL-1β, TGF-β, IL-4 and IL-10 in CM of microglia treated with exosomes from TMZ resistant GBM cells knocking down *lnc-TALC* or the scramble cells (n = 3). Data are presented as the mean ± S.D. P value is determined by Student’s t-test. Significant results are presented as *P < 0.05, **P < 0.01, or ***P < 0.001.

**
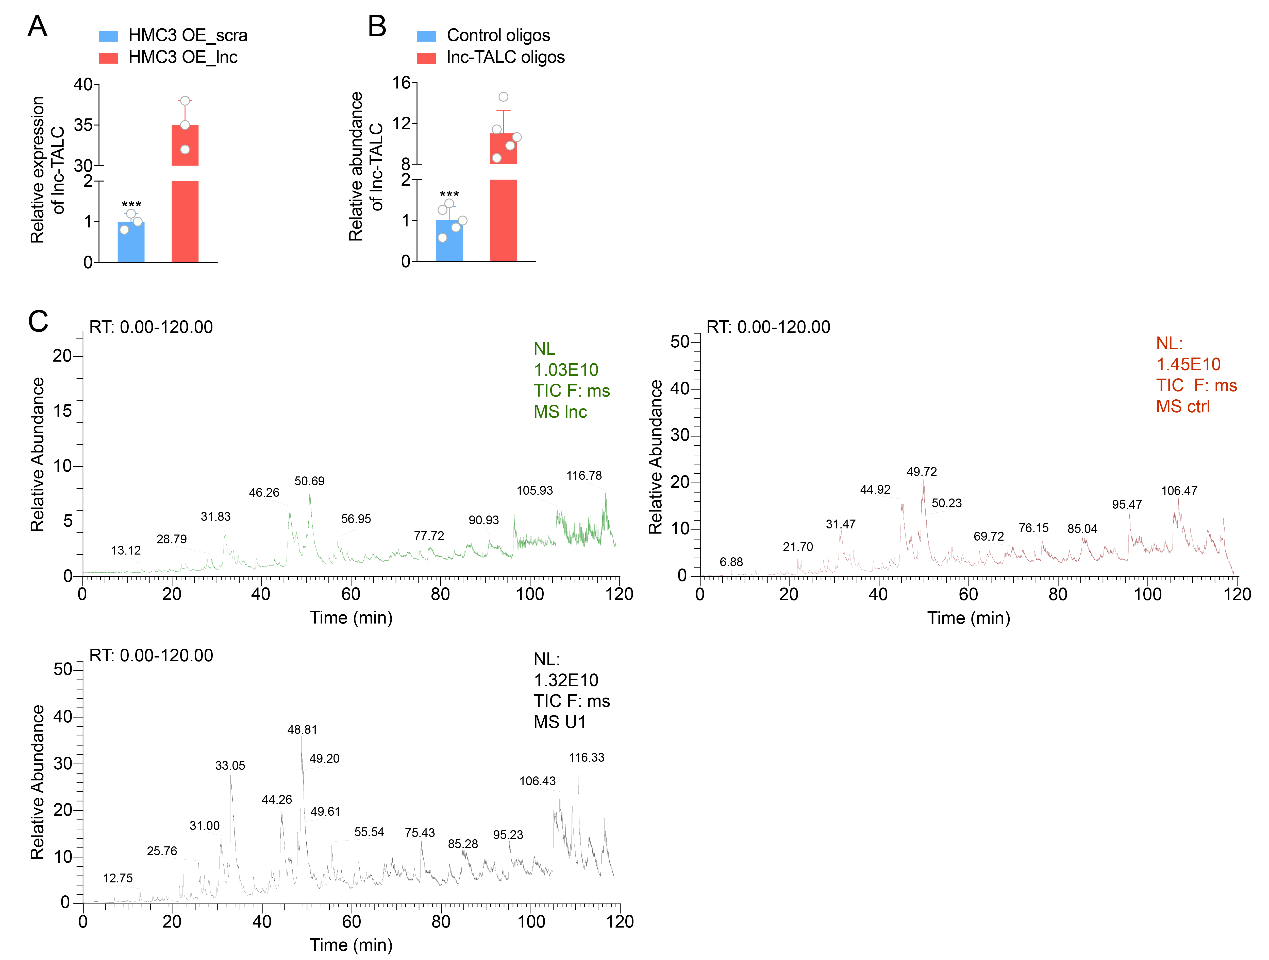
Supplementary Figure S4. ChIRP analysis of *lnc-TALC* interacting proteins.**

A. qRT-PCR analysis validated the overexpression of *lnc-TALC* in HMC3 cells (n = 3). B. *Lnc-TALC* oligos were used to capture *lnc-TALC* from total cellular extracts of HMC3 cells overexpressing *lnc-TALC* (n = 5).

C. The protein peptides isolated by ChIRP (green line). The lncRNA U1 served as a normal control (black line), and scrambled oligos served as a negative control (red line). Data are presented as the mean ± S.D. P value is determined by Student’s t-test. Significant results are presented as ***P < 0.001.

**
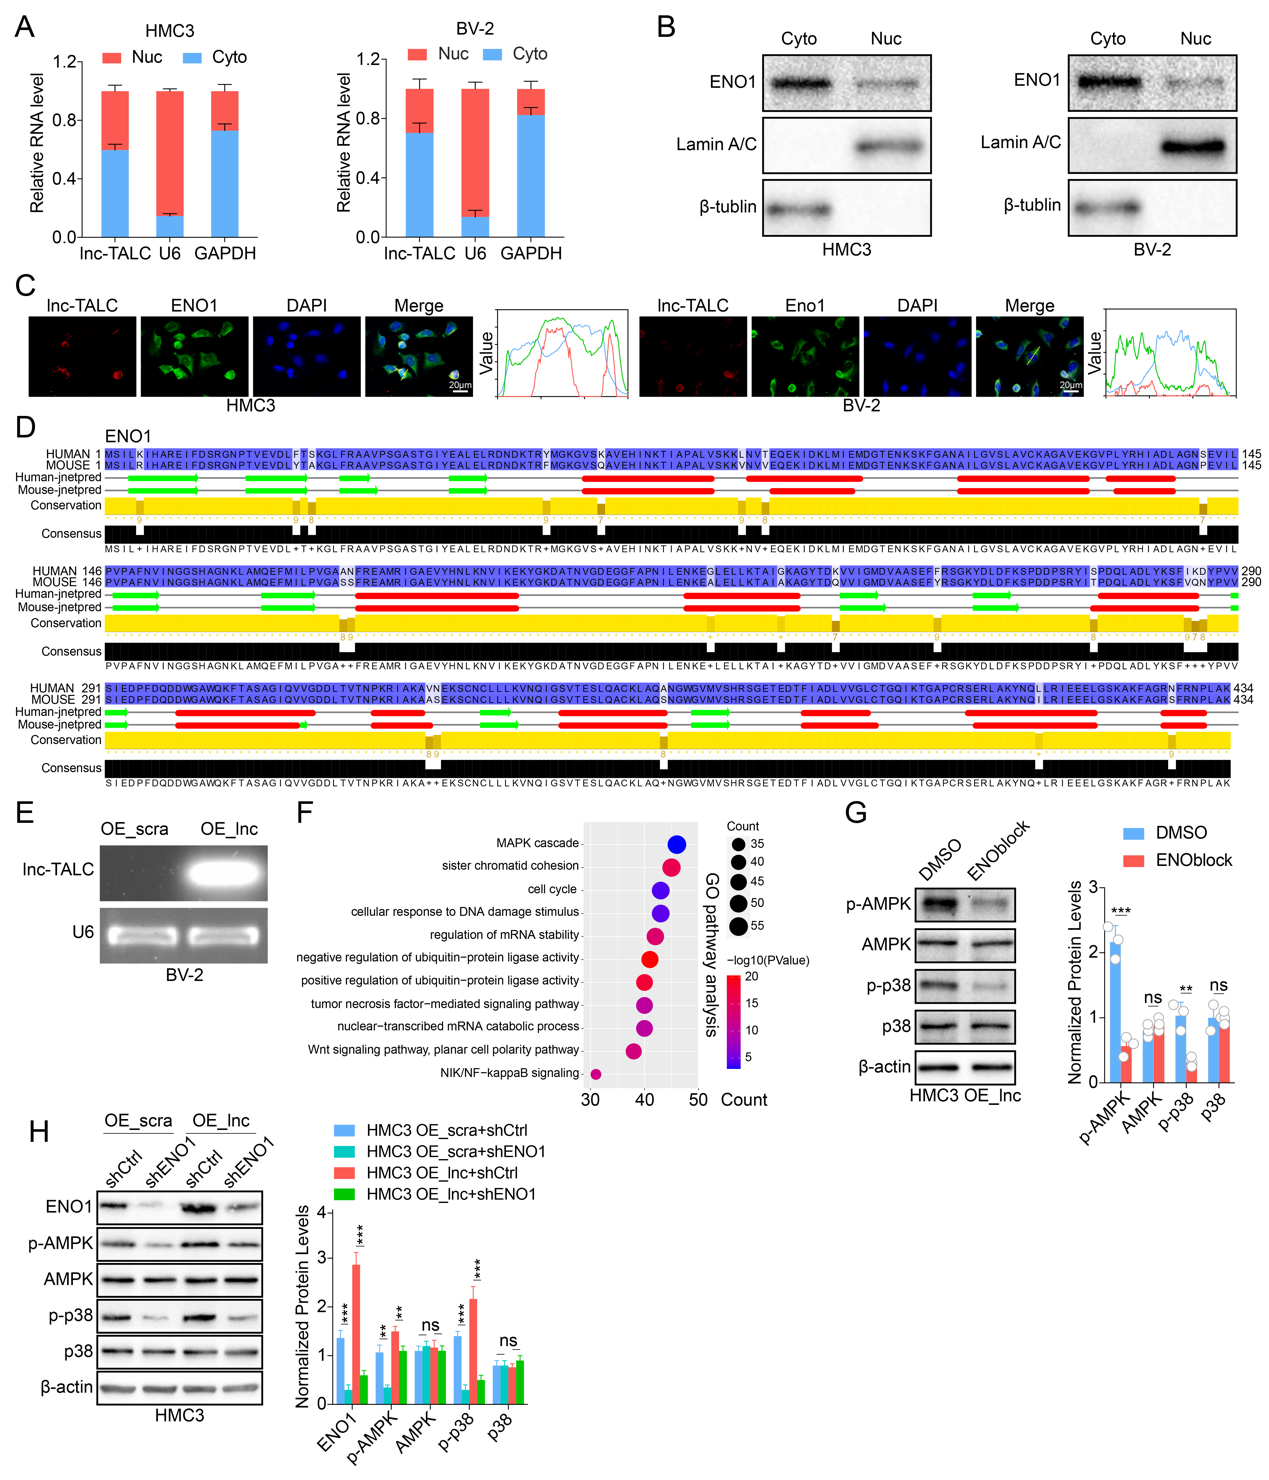
Supplementary Figure S5. The location of *lnc-TALC* and ENO1, and the conservation analysis of ENO1.**

A. Subcellular fractionation studies conducted in HMC3 and BV-2 cells showed that the major of *lnc-TALC* was located to the cytoplasm, as shown by qPCR analysis. Cyto, cytoplasmic; Nuc, nuclear.

B. WB analysis showed that ENO1 protein was mainly located to the cytoplasm. Cyto, cytoplasmic; Nuc, nuclear.

C. Subcellular localization of *lnc-TALC* was examined by RNA FISH (red) in microglia treated with the CM of GBM cells. IF analysis showed the subcellular localization of ENO1 in microglia. Nuclear DNA was visualized with DAPI (blue). Scale bar = 20 μm.

D. Alignment of the ENO1 protein sequence for a diverse cross-section between mouse and human using tCoffee online resource (https://www.ebi.ac.uk/Tools/msa/tcoffee/).

E. The agarose gel electrophoresis validated the overexpression of *lnc-TALC* in BV-2 cells.

F. GO analysis acquired the signaling pathways related to ENO1.

G. WB analysis of p-AMPK, AMPK, p-p38 and p38 in HMC3 cells overexpressing *lnc-TALC* treated with ENOblock (10 μM) or DMSO. Protein levels were normalized to β-actin.

H. WB analysis of the indicated proteins in HMC3 cells after *lnc-TALC* overexpression or ENO1 knockdown. Protein levels were normalized to β-actin. Data are presented as the mean ± S.D. P value is determined by Student’s t-test. Significant results are presented as ns non-significant, **P < 0.01, or ***P < 0.001.

**Supplementary Figure S6. M2 polarization of microglia conferred by exosomal *lnc-TALC* contributes to C5a generation.**

A. Quantification of the relative levels of C5, Arg-1 and CD163 shown in panel Figure 3B compared with β-actin.

B. IF analysis of C5 and Arg-1 in microglia cultured with exosomes from TMZ resistant GBM cells knocking down *lnc-TALC* or the parental cells overexpressing *lnc-TALC*. C. IF analysis of C5a and uPA in aprotinin treated microglia cultured with exosomes from LN229 cells overexpressing *lnc-TALC*.

D. Quantification of the relative levels of p-p38, p38 and C5 shown in panel Figure 3C compared with β-actin. Data are presented as the mean ± S.D. P value is determined by Student’s t-test. Significant results are presented as ns non-significant, **P < 0.01, or ***P < 0.001.

**
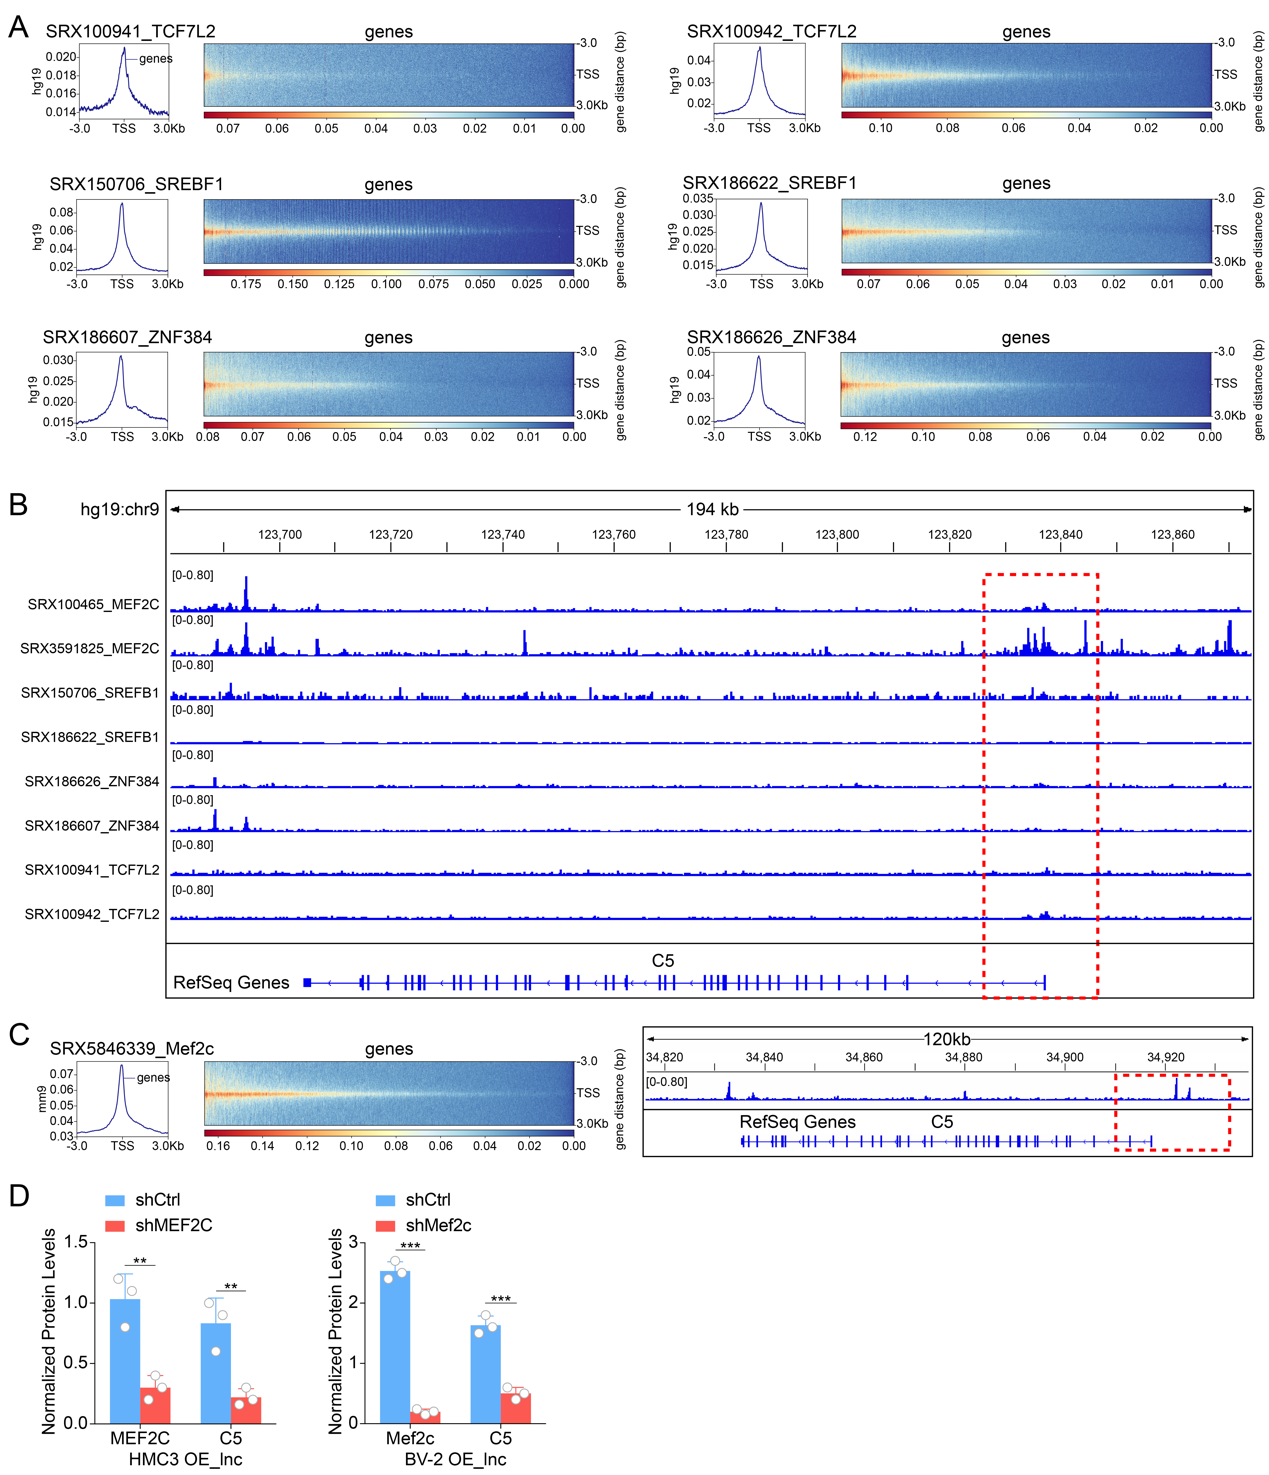
Supplementary Figure S7. ChIP-seq analysis of TCF7L2, SREBF1 and ZNF384 in the promoter regions of C5 gene.**

A. TCF7L2, SREBF1 and ZNF384 binding sites within a region spanning ± 3 kb around TSS in the whole genome.

B. ChIP-seq analysis showing the signal peaks of TCF7L2, SREBF1 and ZNF384 located in the promoter regions of C5 gene.

C. Mef2c binding sites within a region spanning ± 3 kb around TSS in C5 promoter region in mouse genome. ChIP-seq analysis showing the signal peaks of Mef2c located in the promoter regions of C5.

D. Quantification of the relative levels of MEF2C and C5 in HMC3 cells overexpressing *lnc-TALC* shown in panel Figure 3J compared with β-actin. Quantification of the relative levels of Mef2c and C5 in BV-2 cells overexpressing *lnc-TALC* shown in panel Figure 3J compared with β-actin. Data are presented as the mean ± S.D. P value is determined by Student’s t-test. Significant results are presented as **P < 0.01, or ***P < 0.001.

**
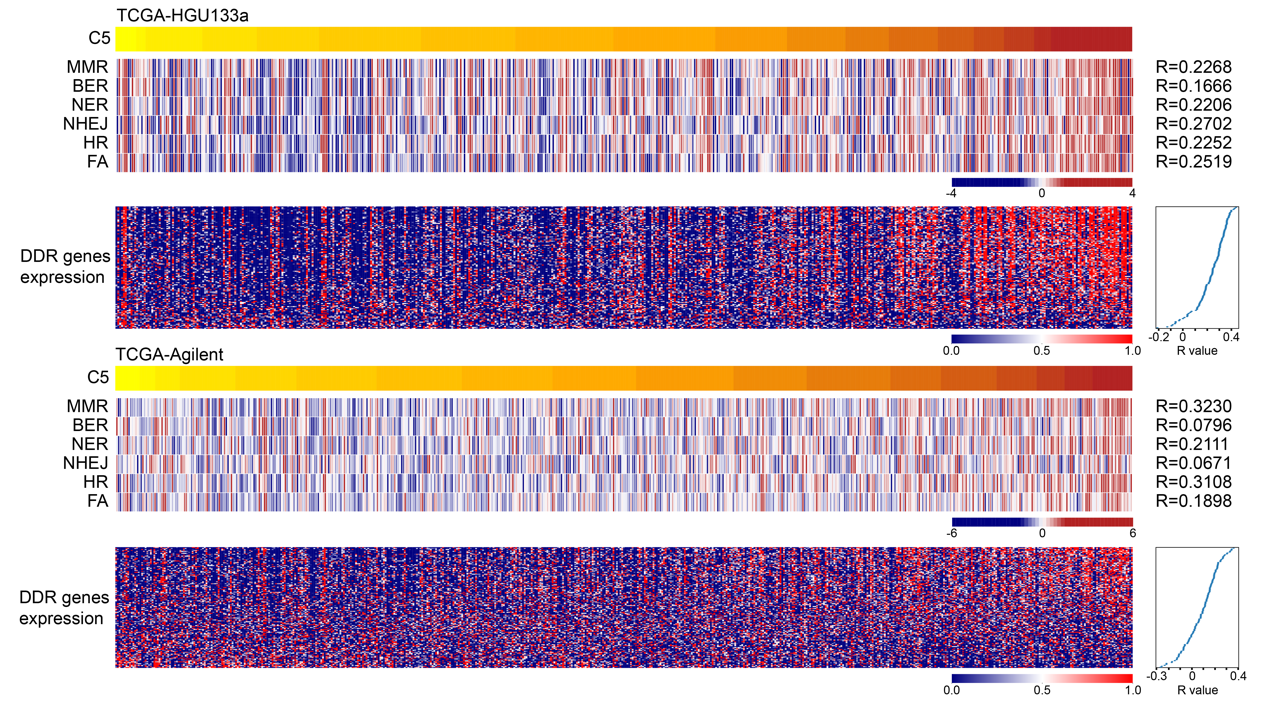
Supplementary Figure S8. Samples from the TCGA-HGU133a and TCGA-Agilent datasets were arranged in ascending order according to their C5 expression. The correlation between expression of C5 and DDR genes, and the correlation between expression of C5 and six DDR canonical pathways were depicted.**

**
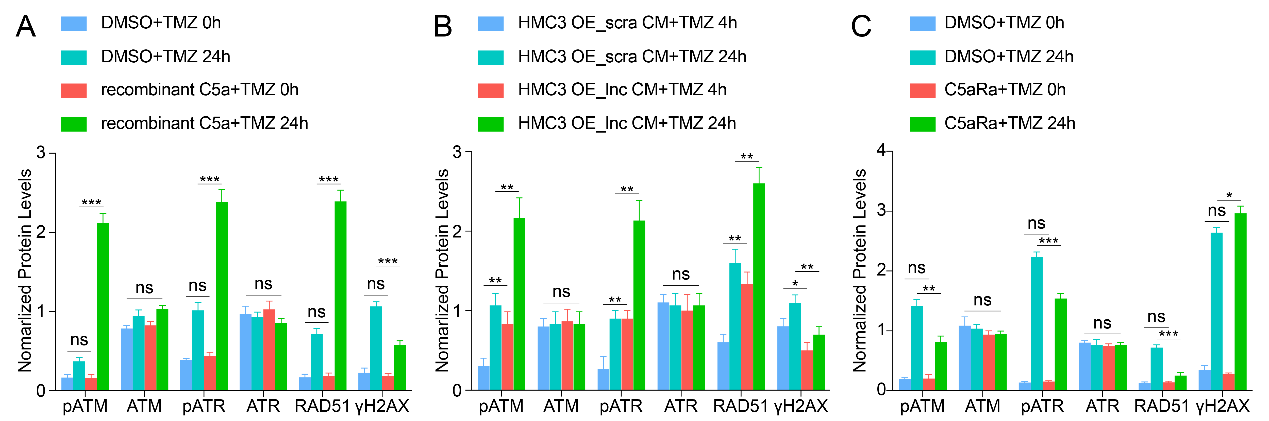
Supplementary Figure S9. Protein levels were normalized to β-actin.**

A. Quantification of the relative levels of DDR-associated proteins shown in Figure 4B compared with β-actin.

B. Quantification of the relative levels of DDR-associated proteins shown in Figure 5A compared with β-actin.

C. Quantification of the relative levels of DDR-associated proteins shown in Figure 5D compared with β-actin. Data are presented as the mean ± S.D. P value is determined by Student’s t-test. Significant results are presented as ns non-significant, *P < 0.05, **P < 0.01, or ***P < 0.001.

**
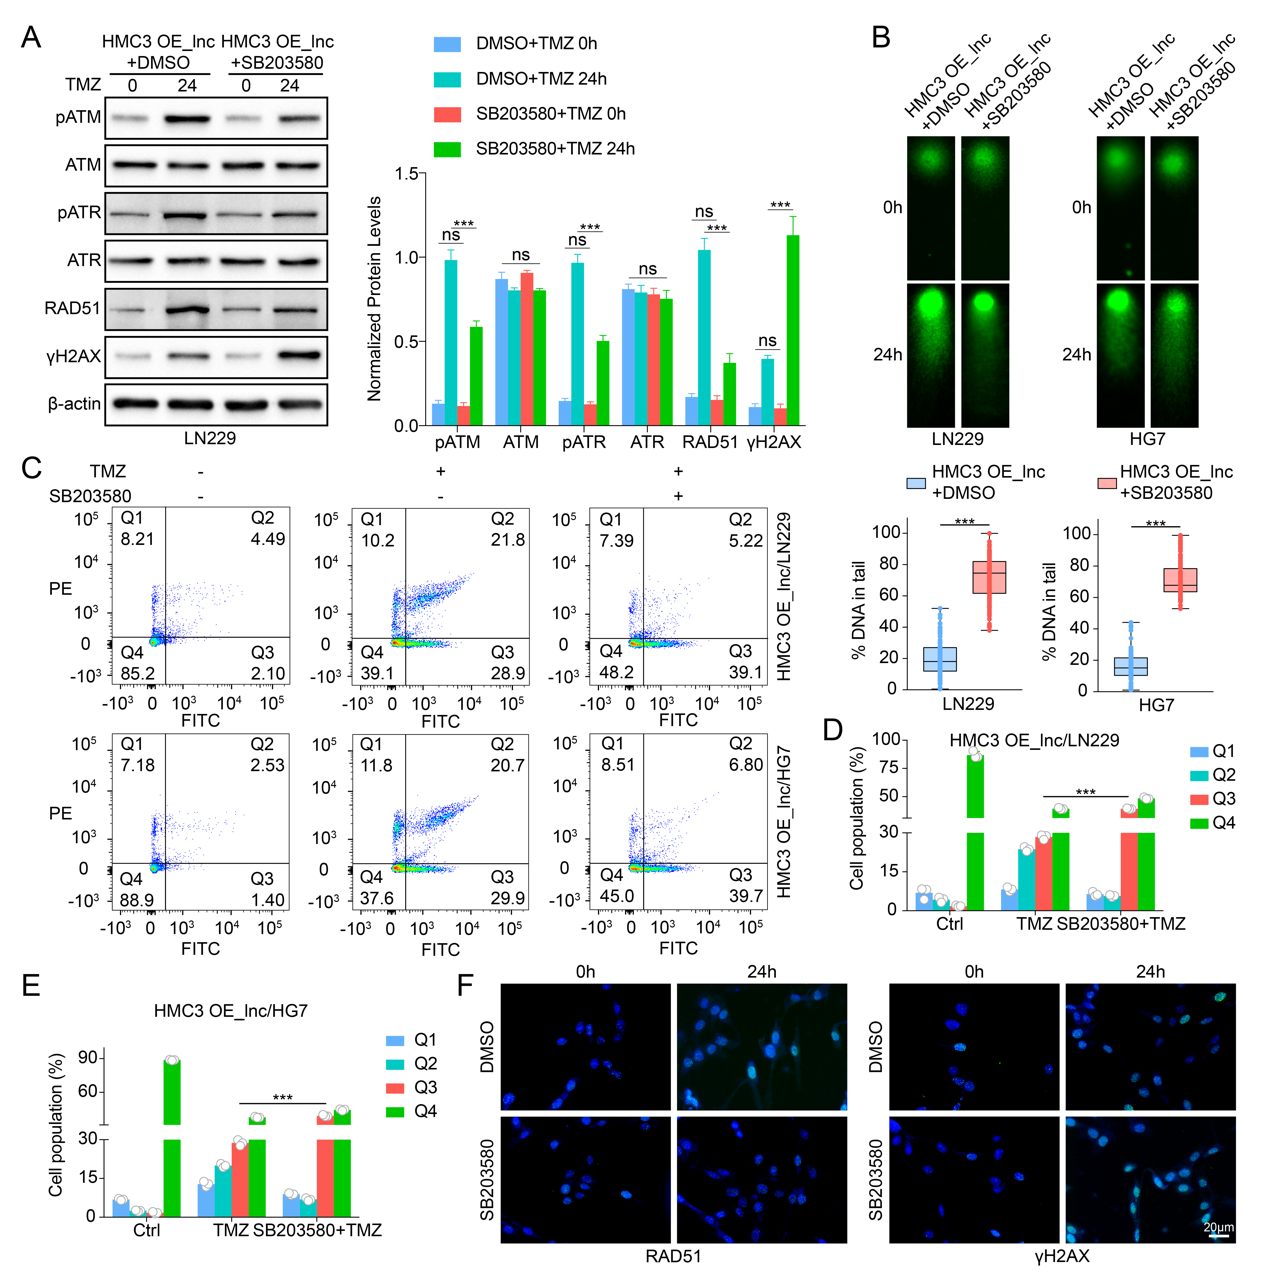
Supplementary Figure S10. The inhibition of p38 axis in microglia attenuates *lnc-TALC* induced TMZ resistance.**

A. WB analysis of pATM, ATM, pATR, ATR, RAD51 and γH2AX in LN229 cells cultured with CM from overexpressing *lnc-TALC* HMC3 cells treated with DMSO or SB203580 after 24 hours TMZ treatment. Protein levels were normalized to β-actin.

B. Comet assays of LN229 cells cultured with CM from overexpressing *lnc-TALC* HMC3 cells treated with DMSO or SB203580 after 24 hours TMZ treatment. The histogram displayed the statistics of comet assay (n = 100). In the box plots, bounds of the box spans from 25 to 75% percentile, center line represents median, and whiskers visualize minimum and maximum of the data points.

C, D, E. HMC3 cells overexpressing *lnc-TALC* were pretreated with SB203580 or DMSO. Apoptosis of GBM cells, which were cultured with CM from HMC3 cells overexpressing *lnc-TALC*. The histogram displayed the statistics of apoptosis analysis.

F. IF analysis of RAD51 and γH2AX in LN229 cells cultured with CM from overexpressing *lnc-TALC* HMC3 cells treated with DMSO or SB203580 after 24 hours TMZ treatment. Data are presented as the mean ± S.D. P value is determined by Student’s t-test. Significant results are presented as ns non-significant, or ***P < 0.001.

**Supplementary Figure S11. The C5a and γH2AX expression in xenograft glioma tissues with TMZ or TMZ combined with C5aRa.**

A. The histogram represented the quantitative evaluation of the C5a expression shown in Figure 6E.

B. IHC staining of γH2AX in consecutive brain sections of mice orthotopically GBM models with GL261 cells overexpressing *lnc-TALC* and the scramble cells. Scale bar = 50 μm. The histogram represented the quantitative evaluation of the γH2AX expression. P value is determined by Chi-squared test. Significant results are presented as ns non-significant, *P < 0.05, or **P < 0.01.

**
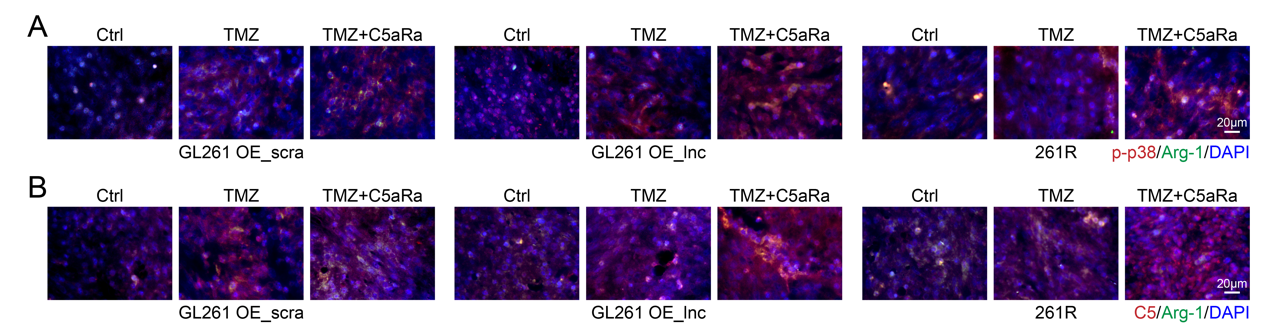
Supplementary Figure S12. IF images of p38 phosphorylation and C5 in tumor-associated microglia *in vivo*.**

A. IF analysis of p38 phosphorylation and Arg-1 in tumor-associated microglia in different groups. Scale bar = 20 μm.

B. IF analysis of C5 and Arg-1 in tumor-associated microglia in different groups. Scale bar = 20 μm.

**
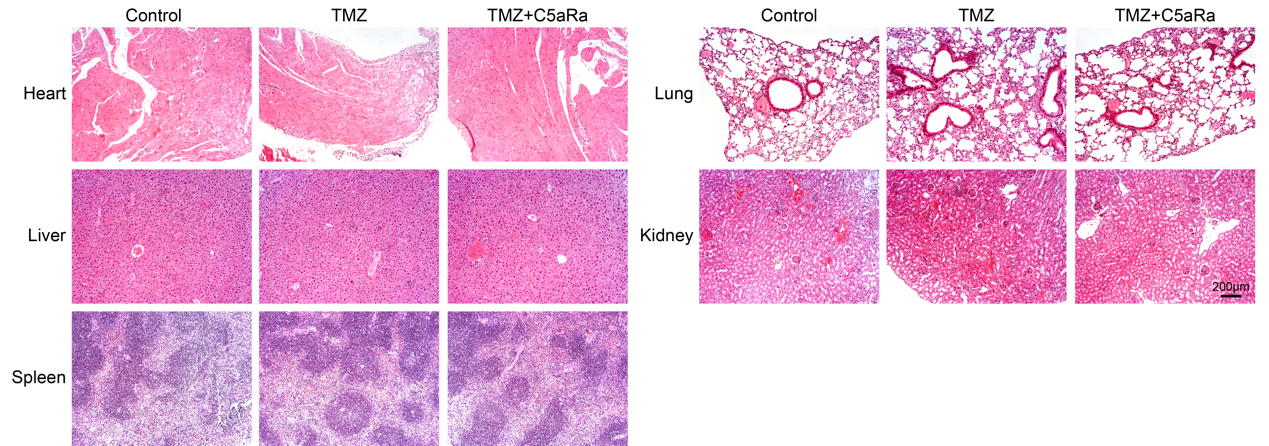
Supplementary Figure S13. The H&E staining of heart, liver, spleen, lung and kidney tissues of mice in different groups.**

The H&E staining images showed the heart, liver, spleen, lung and kidney tissues of mice in different groups. Scale bar = 200 μm.

**Supplementary Tables**

**Supplementary Table S1. Sequences of primers used for qRT-PCR.**

| Target |  | Sequence |
| --- | --- | --- |
| *lnc-TALC* | Forward (5'-3') | CTGGTCCTCAATGCTGCCT |
|  | Reverse (5'-3') | ATCCAGGGTTGACTTCGCAT |
| β-actin | Forward (5'-3') | AATCGTGCGTGACATTAAGGAG |
|  | Reverse (5'-3') | ACTGTGTTGGCGTACAGGTCTT |
| *C5* | Forward (5'-3') | CAGACGAAAGGAGTTCCCATAC |
|  | Reverse (5'-3') | GCAGACAAGATCTCACCTACAA |
| *U6* | Forward (5'-3') | CTCGCTTCGGCAGCACA |
|  | Reverse (5'-3') | AACGCTTCACGAATTTGCGT |

**Supplementary Table S2. The gene-specific primers used for the nested-PCR of the RACE analysis on *lnc-TALC*.**

| Gene specific primer | Sequence |
| --- | --- |
| 3' RACE GSP1 | AGCCCAGAGGCAGTCTATAC |
| 3' RACE GSP2 | CTTCCGTGCCCAACTTAGAAC |
| 5' RACE GSP1 | TCTGAAGTTGGAGTTCTTCATGC |

**Supplementary Table S3. Sequences of sgRNA for knockdown of *lnc-TALC*.**

| sgRNA | Sequence |
| --- | --- |
| sgRNA1 | TAGCATGCATAGCATAAATC |
| sgRNA2 | AATGGATTTCCAACGAGTTC |
| sgRNA3 | ATCCACATTCCAGAACTCGT |
| sgRNA4 | ATATTGCACTTAAGGATAGG |

**Supplementary Table S4. Primary antibodies used in the present study.**

| Antigens | Manufacturer | Catalogue numbers | Application |
| --- | --- | --- | --- |
| iNOS | Proteintech Group | 18985-1-AP | 1:1000 for WB, 1:200 for IF |
| TNF-α | Proteintech Group | 17590-1-AP | 1:1000 for WB, 1:200 for IF |
| CD163 | Proteintech Group | 16646-1-AP | 1:1000 for WB, 1:200 for IF, 1:100 for IHC |
| Arg-1 | Proteintech Group | 16001-1-AP | 1:1000 for WB, 1:200 for IF, 1:100 for IHC |
| β-actin | Zsbio Store | TA-09 | 1:1000 for WB |
| p38 | Cell Signaling Technology | #8690 | 1:1000 for WB |
| LaminA/C | Cell Signaling Technology | #4777 | 1:1000 for WB |
| β-tublin | Proteintech Group | 10094-1-AP | 1:1000 for WB |
| p-p38 | Cell Signaling Technology | #4511 | 1:1000 for WB |
| C5 | Abcam | ab11876 | 1:1000 for WB |
| C5 | Affinity | DF7719 | 1:1000 for WB |
| C5a | Abcam | ab11877 | 1:200 for IF, 1:100 for IHC |
| C5a | Santa Cruz | sc-21941 | 1:200 for IF, 1:100 for IHC |
| uPA | Proteintech Group | 17968-1-AP | 1:200 for IF |
| uPA | Abcam | ab169754 | 1:200 for IF |
| ATM | Abcam | ab32420 | 1:1000 for WB |
| p-ATM | Abcam | ab81292 | 1:1000 for WB |
| ATR | Cell Signaling Technology | #13934 | 1:1000 for WB |
| p-ATR | Cell Signaling Technology | #2853 | 1:1000 for WB |
| RAD51 | Abcam | ab63801 | 1:1000 for WB, 1:200 for IF |
| γH2AX | Abcam | ab26350 | 1:1000 for WB, 1:200 for IF, 1:100 for IHC |
| TSG101 | Abcam | ab125011 | 1:1000 for WB |
| PTRF | Abcam | ab48824 | 1:1000 for WB |
| ENO1 | Cell Signaling Technology | #3810 | 1:1000 for WB, 1:50 for RIP |
| p-AMPK | Cell Signaling Technology | #2535 | 1:1000 for WB |
| AMPK | Cell Signaling Technology | #2532 | 1:1000 for WB |
| MEF2C | Abcam | ab211493 | 1:1000 for WB, 1:50 for ChIP |

**Supplementary Table S5. Probe sequence for *lnc-TALC* in FISH.**

| Target | Probe sequence |
| --- | --- |
| *lnc-TALC* | 5'-TTTTTTGCAGGTTGTCTGAAGTTGGAGTTCTTCATGCTCTGTAGAAACTGTAGTGTATAG-3’ |

**Supplementary Table S6. ChIRP probes for *lnc-TALC*.**

| Primers |  | Sequence |
| --- | --- | --- |
| Primer 1 | Forward | TACACATCTGCTGCCTCTTGG |
|  | Reverse | TGGATCCAGGGTTGACTTCG |
| Primer 2 | Forward | ATCTGCTGCCTCTTGGTAAC |
|  | Reverse | ACTTCGCATCCCTCAAAGAG |

**Supplementary Table S7. ChIRP-MS identified *lnc-TALC* specifically binding proteins.**

| Gene names | Number of proteins | Unique peptides | Sequence coverage | MS MS count | Q value | Score | iBAQ |
| --- | --- | --- | --- | --- | --- | --- | --- |
| KRT1 | 4 | 37 | 61.8 | 1341 | 0.0000 | 323.31 | 1.86E+09 |
| KRT9 | 3 | 37 | 67.4 | 808 | 0.0000 | 323.31 | 5.98E+08 |
| KRT2 | 4 | 30 | 73.9 | 761 | 0.0000 | 323.31 | 3.90E+08 |
| KRT10 | 10 | 26 | 53.8 | 1053 | 0.0000 | 323.31 | 1.11E+09 |
| HNRNPA2B1 | 3 | 16 | 48.2 | 63 | 0.0000 | 154.05 | 1.91E+07 |
| HNRNPK | 6 | 11 | 31.1 | 40 | 0.0000 | 122.29 | 6.77E+06 |
| HNRNPA1 | 11 | 8 | 36.8 | 32 | 0.0000 | 95.815 | 9.53E+06 |
| RPL13 | 6 | 8 | 35.1 | 15 | 0.0000 | 65.789 | 1.09E+07 |
| COL6A3 | 6 | 7 | 3.8 | 20 | 0.0000 | 67.842 | 4.08E+05 |
| KRT5 | 7 | 7 | 53.1 | 328 | 0.0000 | 311.32 | 8.55E+07 |
| ENO1 | 21 | 7 | 24.4 | 18 | 0.0000 | 51.578 | 2.37E+06 |
| DSC1 | 2 | 7 | 10.6 | 33 | 0.0000 | 59.126 | 2.87E+06 |
| RPL18 | 9 | 7 | 41.6 | 31 | 0.0000 | 78.102 | 3.30E+07 |
| TGFBI | 5 | 6 | 13.8 | 47 | 0.0000 | 53.131 | 2.35E+07 |
| HIST1H4A | 1 | 6 | 57.3 | 30 | 0.0000 | 43.225 | 2.73E+07 |
| XP32 | 1 | 6 | 20.8 | 23 | 0.0000 | 40.208 | 1.10E+07 |
| KRT14 | 6 | 5 | 61.7 | 310 | 0.0000 | 323.31 | 8.60E+07 |
| CAT | 1 | 5 | 10.2 | 14 | 0.0000 | 31.91 | 8.93E+05 |
| HBB | 15 | 4 | 29.3 | 6 | 0.0000 | 26.149 | 1.14E+06 |
| DCD | 2 | 4 | 29.1 | 19 | 0.0000 | 25.562 | 2.09E+07 |
| HSPA8 | 14 | 4 | 13.1 | 14 | 0.0000 | 41.967 | 9.80E+05 |
| ALDOA | 9 | 4 | 12.8 | 5 | 0.0000 | 25.84 | 8.08E+05 |
| FABP5 | 2 | 4 | 31.9 | 5 | 0.0000 | 30.645 | 5.22E+05 |
| HIST1H2AJ | 27 | 3 | 20.7 | 29 | 0.0000 | 50.052 | 2.04E+07 |
| HBA1 | 3 | 3 | 38.7 | 12 | 0.0000 | 42.095 | 1.10E+07 |
| PIP | 1 | 3 | 26 | 7 | 0.0000 | 22.449 | 3.11E+06 |
| H3F3B | 11 | 3 | 25 | 5 | 0.0000 | 19.519 | 1.42E+07 |
| RPSA | 4 | 3 | 17.1 | 4 | 0.0000 | 30.857 | 8.42E+05 |
| ALOX12B | 2 | 3 | 4.7 | 4 | 0.0000 | 18.979 | 2.99E+05 |
| CALML5 | 1 | 3 | 15.1 | 2 | 0.0000 | 21.5 | 2.08E+06 |
| ALDH3A1 | 8 | 2 | 8.3 | 5 | 0.0000 | 11.91 | 1.24E+06 |
| LUM | 1 | 2 | 6.5 | 9 | 0.0000 | 17.25 | 2.49E+06 |
| COL6A1 | 2 | 2 | 3.3 | 6 | 0.0000 | 28.652 | 4.40E+05 |
| KERA | 1 | 2 | 7.7 | 12 | 0.0000 | 18.32 | 3.47E+06 |
| S100A16 | 1 | 2 | 22.3 | 6 | 0.0000 | 15.24 | 3.35E+06 |
| HIST1H1C | 5 | 2 | 12.7 | 5 | 0.0000 | 12.294 | 2.06E+06 |
| HIST1H2BN | 18 | 2 | 9.6 | 5 | 0.0000 | 12.44 | 8.49E+06 |
| YWHAZ | 21 | 2 | 13.4 | 4 | 0.0000 | 36.445 | 5.68E+05 |
| ANXA1 | 2 | 2 | 7.8 | 3 | 0.0000 | 16.607 | 2.27E+05 |
| LYZ | 3 | 1 | 11.5 | 2 | 0.0044 | 6.2839 | 3.98E+05 |
| PRDX2 | 3 | 1 | 10.6 | 3 | 0.0000 | 7.0814 | 7.85E+05 |
| HSPA7 | 7 | 1 | 10.9 | 4 | 0.0000 | 17.617 | 7.50E+05 |
| RPL29 | 2 | 1 | 9 | 3 | 0.0000 | 8.5866 | 1.48E+06 |
| NCCRP1 | 1 | 1 | 4 | 3 | 0.0000 | 6.7183 | 5.30E+05 |
| IGHG2 | 4 | 1 | 3.5 | 3 | 0.0000 | 7.1362 | 2.06E+05 |
| VTA1 | 2 | 1 | 5.9 | 3 | 0.0044 | 6.3979 | 6.73E+05 |
| LRRN2 | 1 | 1 | 1.5 | 2 | 0.0000 | 7.0161 | 4.34E+05 |
| IGLL5 | 6 | 1 | 14.2 | 2 | 0.0000 | 7.0134 | 1.61E+06 |
| KRT4 | 2 | 1 | 5.9 | 1 | 0.0044 | 6.3401 | 4.28E+05 |
| PRSS1 | 9 | 1 | 14.1 | 4 | 0.0000 | 7.175 | 5.33E+07 |
| HSP90AB1 | 7 | 1 | 4.8 | 8 | 0.0000 | 21.759 | 6.30E+05 |
| KRT74 | 10 | 0 | 7.6 | 40 | 0.0000 | 15.935 | 7.23E+06 |

**Supplementary Table S8. GO analysis of signaling pathway associated with *ENO1*-related genes.**

| Pathway | Enrichment Genes | P value | Ratio |
| --- | --- | --- | --- |
| GO:0000165~MAPK cascade | 46 | 9.93E-04 | 2.1905 |
| GO:0007062~sister chromatid cohesion | 45 | 5.43E-17 | 2.1429 |
| GO:0006974~cellular response to DNA damage stimulus | 43 | 3.97E-05 | 2.0476 |
| GO:0007049~cell cycle | 43 | 1.09E-04 | 2.0476 |
| GO:0043488~regulation of mRNA stability | 42 | 1.40E-14 | 2.0000 |
| GO:0051436~negative regulation of ubiquitin-protein ligase activity | 41 | 4.69E-21 | 1.9524 |
| GO:0051437~positive regulation of ubiquitin-protein ligase activity | 40 | 1.21E-18 | 1.9048 |
| GO:0033209~tumor necrosis factor-mediated signaling pathway | 40 | 5.51E-11 | 1.9048 |
| GO:0000184~nuclear-transcribed mRNA catabolic process | 40 | 7.36E-11 | 1.9048 |
| GO:0060071~Wnt signaling pathway, planar cell polarity pathway | 38 | 1.85E-13 | 1.8095 |
| GO:0038061~NIK/NF-kappaB signaling | 31 | 7.73E-13 | 1.4762 |

**Supplementary Table S9. Transcription factors’ potential binding sites in C5 promoter region.**

| Name | Score | Start | End |
| --- | --- | --- | --- |
| ZNF284 | 20.5509 | 1035 | 1046 |
| ZNF460 | 20.3319 | 50 | 65 |
| ZNF135 | 17.9044 | 51 | 64 |
| CEBPG | 16.407 | 1677 | 1691 |
| TCF7L2 | 16.3692 | 1685 | 1698 |
| ZNF384 | 16.3083 | 1138 | 1149 |
|  | 16.3083 | 1139 | 1150 |
|  | 16.3083 | 1140 | 1151 |
|  | 16.3083 | 1141 | 1152 |
|  | 16.3083 | 1142 | 1153 |
|  | 15.3785 | 1137 | 1148 |
|  | 15.0046 | 1136 | 1147 |
| ZNF518A | 16.1948 | 796 | 805 |
|  | 14.3746 | 1344 | 1353 |
| SREBF1 | 14.8777 | 911 | 924 |
| ZNF770 | 14.5886 | 96 | 107 |
| MEF2C | 14.1137 | 969 | 983 |
|  | 13.8703 | 763 | 777 |
|  | 13.8218 | 1806 | 1820 |

**Supplementary Table S10. The median overall survival of patients in TCGA-RNA-seq, TCGA-Agilent and TCGA-HGU133a datasets.**

| Dataset | TCGA-RNAseq | | TCGA-Agilent | | TCGA-HGU133a | |
| --- | --- | --- | --- | --- | --- | --- |
| Group | Low | High | Low | High | Low | High |
| Median survival time (Days) | 427 | 394 | 454 | 370 | 460 | 372 |
| 95% CI of ratio | 0.7471-1.572 | | 1.009-1.492 | | 1.021-1.498 | |

**Supplementary Table S11. Blood routine analysis in blood samples of mice bearing orthotopic glioma at the end of experiment.**

| Group | WBC  [K μL-1] | RBC  [M μL-1] | Hbg  [g L-1] | Plt  [×109 L-1] |
| --- | --- | --- | --- | --- |
| Control | 8.39±0.12 | 10.13±0.30 | 145.22±1.94 | 1043.98±34.42 |
| TMZ | 8.62±0.31 | 11.04±0.16 | 142.32±0.27 | 991.61±56.71 |
| TMZ+C5aRa | 8.46±0.28 | 9.96±0.34 | 144.57±1.44 | 1027.39±58.70 |

**Supplementary Table S12. Values of serum enzymes in blood samples of mice treated with drugs.**

| Group | ALT  [U L-1] | AST  [U L-1] | BUN  [mmol L-1] | CREA  [μmol L-1] | TBIL  [μmol L-1] |
| --- | --- | --- | --- | --- | --- |
| Control | 44.62±0.97 | 229.14±1.72 | 8.04±0.41 | 10.96±0.40 | 2.08±0.62 |
| TMZ | 45.67±1.95 | 234.56±2.96 | 8.31±0.31 | 11.19±0.26 | 2.57±0.44 |
| TMZ+C5aRa | 47.83±2.41 | 242.12±1.98 | 8.62±0.38 | 11.42±0.43 | 2.68±0.55 |
